# Supplementary material for: Combination of Experimental and Bioinformatic Approaches for Identification of Immunologically Relevant Protein–Peptide Interactions
Source: MDPI journal article supplement (doi:10.3390/biom13020310), 2023-02-07
Supplement: s1 [file s1]

## ONLINE SUPPLEMENT

### COMBINATION OF EXPERIMENTAL AND BIOINFORMATIC APPROACHES FOR IDENTIFICATION OF IMMUNOLOGICALLY RELEVANT PEPTIDE-PROTEIN INTERACTIONS

#### Input parameters for PuLSE software:

Insert of interest was identified by the software through the determination of flanking sequences.

For linear library (Ph.D.-7 and Ph.D.-12):

Fw: CAC TCT (XXX)<sub>7/12</sub> GGT GGA

Rv: TCC ACC (XXX)<sub>7/12</sub> AGA GTG

For cyclic library (Ph.D.-C7C):

Fw: GCT TGT (XXX)<sub>7</sub> TGC GGT

Rv: ACC GCA (XXX)<sub>7</sub> ACA AGC

At the end of the PuLSE script, for forward direction, an argument “UAG Q” was added to change the coding from a stop codon into glutamine (in phage expression system modification is made, so that UAG instead of coding a stop codon, it expresses a glutamine residue).

#### Elimination of non-target binders

**Suppl. Table 1:** Sequences from the third round of panning appearing in other (previously reported) biopanning experiments. Data was analyzed using MimoScan and MimoSearch. We obtained sequences that have already appeared in previous panning experiments (thus, likely not target binders). Accessed on 10.11.2022

| Query           | Matched Peptide | Biopanning Data Set ID | Target Name                                              |
|-----------------|-----------------|------------------------|----------------------------------------------------------|
| <b>Ph.D.-12</b> |                 |                        |                                                          |
| DYHDPSLPTLRK    | DYHDPSLPTLRK    | <a href="#">3260</a>   | Anti-imidaclothiz monoclonal antibody 1E7                |
|                 | DYHDPSLPTLRK    | <a href="#">3517</a>   | P. aeruginosa H103 (PAO1 wild-type prototroph)           |
| QVNLGERSQQM     | QVNLGERSQQM     | <a href="#">3376</a>   | Complement decay-accelerating factor                     |
|                 | QVNLGERSQQM     | <a href="#">3448</a>   | IgE from patients with allergy to Scylla paramamosain AK |
|                 | QVNLGERSQQM     | <a href="#">3517</a>   | P. aeruginosa H103 (PAO1 wild-type prototroph)           |
| RDYHPRDHTATW    | RDYHPRDHTATWGGG | <a href="#">3109</a>   | NIST RM8670 (NISTmAb)                                    |
| SPLRAVAFSGAQ    | SPLRAVAFSGAQGGG | <a href="#">3109</a>   | NIST RM8670 (NISTmAb)                                    |

|                |                  |                      |                                               |
|----------------|------------------|----------------------|-----------------------------------------------|
| VCSPCGVPVPPAK  | VCSPCGVPVPPAKGGG | <a href="#">3109</a> | NIST RM8670 (NISTmAb)                         |
| GADTSKPPRFVT   | GADTSKPPRFVTGGG  | <a href="#">3109</a> | NIST RM8670 (NISTmAb)                         |
| GNNPLHVHHDKR   | GNNPLHVHHDKRGGG  | <a href="#">3109</a> | NIST RM8670 (NISTmAb)                         |
|                | SGNNPLHVHHDKR    | <a href="#">3211</a> | T lymphocyte leukemia cell line Jurkat        |
|                | GNNPLHVHHDKR     | <a href="#">3387</a> | Endoglin                                      |
| <b>Ph.D.-7</b> |                  |                      |                                               |
| NERALTL        | NERALTL          | <a href="#">2191</a> | Epoxy                                         |
|                | NERALTL          | <a href="#">2978</a> | Fusion glycoprotein F0                        |
|                | NERALTL          | <a href="#">3013</a> | Fusion protein                                |
|                | NERALTL          | <a href="#">3257</a> | Human prostate cancer cell line PC3           |
|                | NERALTL          | <a href="#">3327</a> | Anti-Haemonchus contortus polyclonal antibody |
|                | NERALTL          | <a href="#">3330</a> | Beta-nerve growth factor, Beta-NGF            |
| GYKDFSA        | GYKDFSA          | <a href="#">2977</a> | Hemagglutinin-esterase (HE)                   |
|                | GYKDFSA          | <a href="#">3012</a> | Hemagglutinin-esterase, HE                    |
| TPARHIY        | TPARHIY          | <a href="#">2978</a> | Fusion glycoprotein F0                        |
|                | TPARHIY          | <a href="#">3013</a> | Fusion protein                                |
|                | TPARHIY          | <a href="#">3257</a> | Human prostate cancer cell line PC3           |
| SPSTHWK        | SPSTHWK          | <a href="#">2413</a> | Crystalline Ni3B                              |
| TFASHDQ        | TFASHDQ          | <a href="#">3330</a> | Beta-nerve growth factor, Beta-NGF            |
| TNSSFHK        | TNSSFHK          | <a href="#">2412</a> | Amorphous Ni3B                                |
| LGSPMSN        | LGSPMSN          | <a href="#">3330</a> | Beta-nerve growth factor, Beta-NGF            |
| MTKQEYA        | CTGRMTXQXXXA     | <a href="#">358</a>  |                                               |
| HWSTTIS        | HWSTTIS          | <a href="#">3330</a> | Beta-nerve growth factor, Beta-NGF            |
| RILITIP        | RILITIP          | <a href="#">2977</a> | Hemagglutinin-esterase, HE                    |
|                | RILITIP          | <a href="#">3012</a> | Hemagglutinin-esterase, HE                    |
| MTKQEAL        | CTGRMTXQXXXA     | <a href="#">358</a>  |                                               |
| MTKQETM        | CTGRMTXQXXXA     | <a href="#">358</a>  |                                               |
| LSNNNLR        | LSNNNLR          | <a href="#">2349</a> | Silicon dioxide, SiO2                         |
|                | LSNNNLR          | <a href="#">3257</a> | Human prostate cancer cell line PC3           |

Three sequences containing the TKQE motif recognized by MEME software, were found in the SAROTUP web server tools, since they contained a consensus MTXQX and were thus also removed from further analysis.

The principle of the SAROTUP web server is that a peptide which is not found in the BDB database might be a specific binder to the target of interest. On the other hand, if a peptide is found in BDB (and obtained through a different target), it is more plausible to be noise since there is a small chance of obtaining identical peptides by different targets (<http://i.uestc.edu.cn/sarotup3/cgi-bin/MimoSearch.pl> access: 10.11.22).

At this point, SAROTUP Ph.D7Faster 2.0 can also be used to look at the Ph.D.-7 and Ph.D.-C7C sequences that have a growing advantage during replication and are thus less likely to be specific binders.

## Amino acid motifs of potential conformational epitopes

**Suppl. Figure 1:** Motifs obtained after the first and second panning round, obtained from the XSTREME tool. Common motifs TKQE, GKI and KPN, can already be observed after the first panning round.

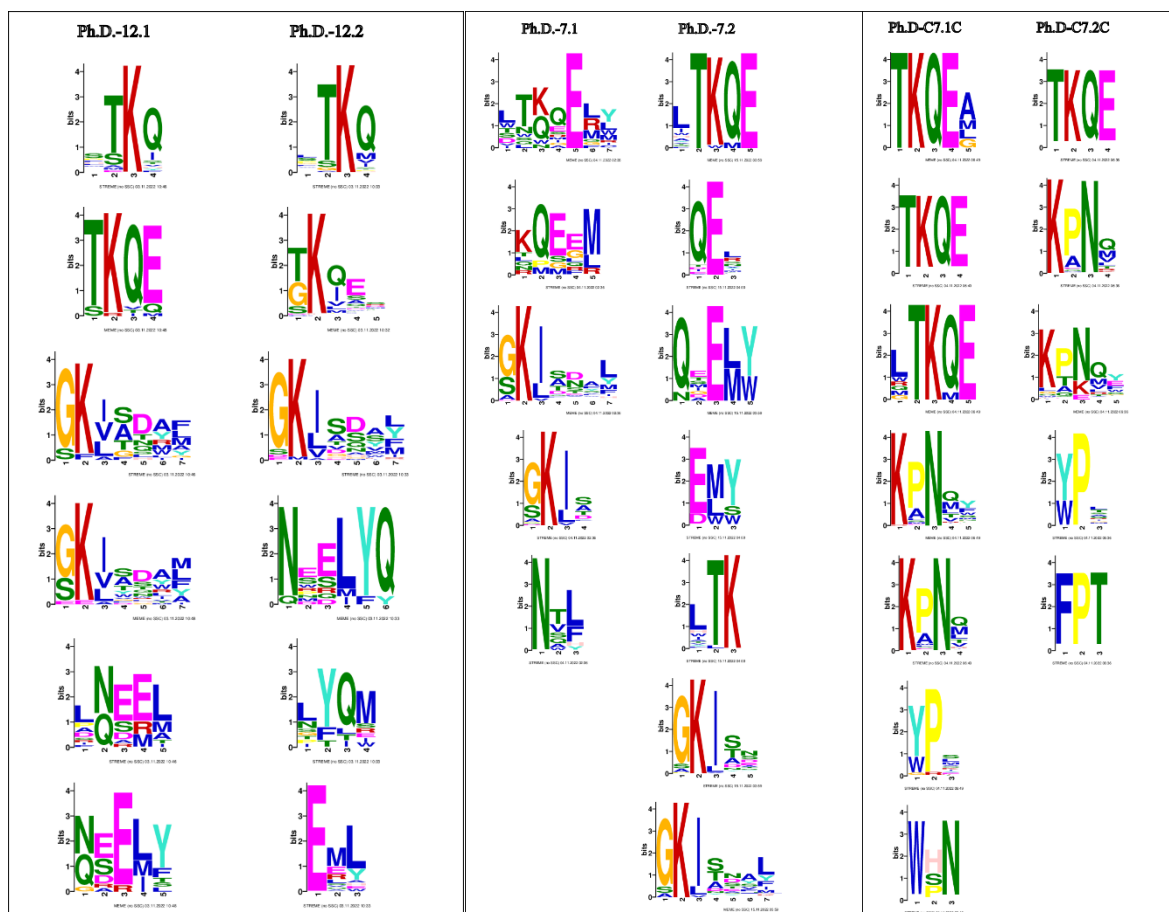

**Identification of three peptide clusters indicates three potential epitope regions on the allergen**

**Suppl. Table 2:** Three peptide clusters generated by Hammock. Cleaned data of 525 peptides were subjected to the Hammock tool. 460 peptides were distributed into clusters.

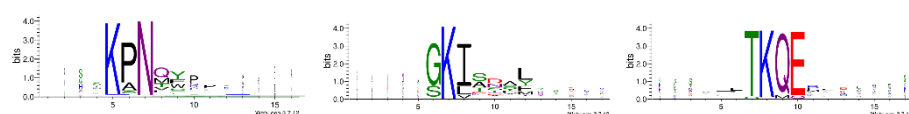

|                  |                    |                   |
|------------------|--------------------|-------------------|
| YSSLKPNKY-AVW--- | ---YAGKISVGMGRGH-- | -----YTKQEVW----- |
| --YNKPNHY-----   | ----TSKIADFYGFKN-  | -----WTKQESL----- |
| ---YKPNVY-V----- | -TDGRGKIYSWFS----  | ---WSKTKQE-----   |

|                  |                   |                    |
|------------------|-------------------|--------------------|
| ---YKLNQWPTPLMP- | -SYSQGKIAASFP---- | ---WPWTKME-----    |
| ---YKANQFL-----  | --SSNGKVSNYFVY--- | WNNPQFTKQEMI-----  |
| ---WKPNQA-PFPAPM | -----SKVADWF----- | ---WGMTKQE-----    |
| VPKPNVGMWGPV---- | -----SKLADYL----- | VTSTLGTKQEVV-----  |
| ---VKPNQY-M----- | -----SKLADFL----- | -----VTKQEYM-----  |
| ---VKPNQY-A----- | -----SKLADAL----- | --VQNGTKQELLMT---  |
| ---VKPNLY-PSWNMS | -----SKIYTSL----- | ---VPLTKQQALDQG--  |
| ---VKPNLY-PSNDPI | -----SKIYDYNTSHGV | -----TTKQERL-----  |
| ----TVGSWMDNKVIA | -----SKITTKL----- | -----TTKQEQISMSSS  |
| -----TNAWVDG---- | -----SKITSVL----- | TPTGWTTKQERV-----  |
| ---TKSNQYQ-----  | -----SKITQYF----- | ---TPPTKQESYLMR--  |
| ---TKSNMYN-----  | -----SKITNFY----- | --TNVYTKQESMIM---  |
| ---TKPNQTQ-----  | -----SKITDYL----- | -----TKQERYS----   |
| ---TKPNQSS-----  | -----SKISSWY----- | -----TKQERPQ----   |
| ---TKPNQSI-----  | -----SKISNYM----- | -----TKQERPL----   |
| ---TKPNQSA-----  | -----SKISDWF----- | -----TKQERAV----   |
| ---TKPNQGH-----  | -----SKISDTYGWKVW | -----TKQEMRL----   |
| ---TKLNMYN-----  | -----SKISDSF----- | -----TKQEMHY----   |
| ---TKANQFR-----  | -----SKIQDVL----- | -----TKQELPY----   |
| --STKPNTF-----   | -----SKIHDYLGEQLK | -----TKQEHST----   |
| --STKPNQS-----   | -----SKIGDAL----- | -----TKQEGRT----   |
| --STKPNQF-----   | -----SKIETSLNSMTN | -----TKQEGNS----   |
| --SSKPNVH-----   | -----SKIDKFF----- | -----TKQEAQM----   |
| --SSKPNVF-----   | -----SKIATSL----- | -----TKQEAQF----   |
| --SSKPNTF-----   | -----SKIANAVQVQKT | -----TKQEAPI----   |
| --SNKPNTT-----   | -----SKIAESI----- | -----TKQEANW----   |
| ---SKPNVY-W----- | -----SKIAEAY----- | -----TKQEAGR----   |
| ---SKPNQY-S----- | -----SKIADSL----- | ---THLTKQE-----    |
| ---SKPNQSY-----  | SGVFHSKLANAY----- | -----STKQETYTDKHY  |
| ---SKPNQSS-----  | ---NTNKISNWFNIH-- | -----STKQESL-----  |
| ---SKPNQSQ-----  | -NENAGKIATYLV---- | ----SQTKQELSANFL-  |
| ---SKPNQSN-----  | ---NEGKISGYFWSI-- | SPTYVLTKQERV-----  |
| ---SKPNQGY-----  | LLANTGKIQKYL----- | -SPDHYTEKQERNR---- |
| ---SKPNQGM-----  | -GYFSGKVAQAQR---- | --SNNLTKMEWLET---  |
| ---SKPNQF-H----- | GTYPVSKVASAF----- | ---SNKTKQE-----    |
| ---SKPNMY-S----- | -----GKYQQYLQNYRA | ---SNGTKQE-----    |
| ---SKPNMY-N----- | -----GKVTQALRGNWG | ----SLTKQQHLDTEP-  |
| ---SKPNMY-A----- | -----GKVTERMTQALK | --SHPFSKQELREN---  |
| ---SKPNMF-M----- | -----GKVSNAY----- | ---SHGTKQE-----    |
| --SHKPNVF-----   | -----GKVATAL----- | -SGIGHTKMELHR----  |
| --SGKPNVW-----   | -----GKVADYY----- | ---QWQTKQE-----    |
| --SGKPNLY-----   | -----GKVADSFELPPG | ---QNGTKQE-----    |
| --SGKPNKW-----   | -----GKLTEYLSRDAS | ----QLTKQER-----   |
| --QGKPNQWANYFL-- | -----GKLTDKL----- | ---PNLTKQE-----    |
| -PHKKPNQ-----    | -----GKLSTYY----- | ---PLKTKQE-----    |
| ----NVGQWPR----- | -----GKLSTFF----- | ---PGQTKQE-----    |
| ---NKPNVF-G----- | -----GKLSSVMDGSKH | ----NWTKQERWAVSA-  |
| ---NKPNQY-G----- | -----GKLSSFL----- | NVSFL-TKQELSR----  |
| ---NKPNQY-F----- | -----GKLSNLFDFYSK | -----NTKQETYVVLGS  |
| ---NKPNQF-Y----- | -----GKLSMAYATAIE | -----NTKQEIA-----  |
| ---NKPNMY-A----- | -----GKLSIYY----- | ---NMLTKQE-----    |

|                   |                    |                    |
|-------------------|--------------------|--------------------|
| ---NKP NMSS-----  | -----GKLSESF FEKLT | ----NLSKQERLQLSI-  |
| ---NKP NKF-M----- | -----GKLSEKL-----  | ---MKGTKQE-----    |
| --MSKPNQW-----    | -----GKLSDSINRSKM  | ----MGTKQEHLGPIR-  |
| ---MHPNTYP-----   | -----GKLSDMFDDPSR  | ---MDPTKQEKRSQI--  |
| --MDKPNRW-----    | -----GKLSDLLSPEGQ  | -----LTRQESHDLTNG  |
| --MCKPNMACADLT--  | -----GKLSAAYESKVP  | -----LTKQEYI-----  |
| ---LKPNMF-A-----  | -----GKLDAYYSRNRP  | -----LTKQETS-----  |
| --LDKPNRY-----    | -----GKLATAYSSQIS  | -----LTKQETMGRVAG  |
| ----KSNQYPQ-----  | -----GKLASAM-----  | -----LTKQETG-----  |
| ----KSNQYPM-----  | -----GKLAQAYQANLS  | -----LTKQESR-----  |
| ----KSNQWPV-----  | -----GKLADYL-----  | -----LTKQERM-----  |
| ----KSNMYP S----- | -----GKIYN AI----- | -----LTKQENV-----  |
| ----KSNMYPQ-----  | -----GKIVNYIEDAHN  | -----LTKQENT-----  |
| ----KQNQYPA-----  | -----GKIVNSL-----  | -----LTKQENS-----  |
| ----KPNVY-PY----  | -----GKIVDSLQSSP   | -----LTKQEMIVDSRF  |
| ----KPNVY-PS----  | -----GKIVDSHVDMFR  | -----LTKQEKAQTVPW  |
| ----KPNVY-PL----  | -----GKITSTL-----  | ----L-TKQEIT-----  |
| ----KPNVWPT-----  | -----GKITSQL-----  | -----LTKQEGM-----  |
| ----KPNVWPR-----  | -----GKITSMY-----  | -LSNQYTRQEMLD----  |
| ----KPNVGPT-----  | -----GKITQSL-----  | ----LQTKQEDWTPRS-  |
| ----KPNVF-PS----  | -----GKITQAMNVSQR  | ----LPTKQEHYTFHQ-  |
| ----KPNTWPT-----  | -----GKITNVF-----  | --LPAHTKQEMRYL---  |
| ----KPNTWPQ-----  | -----GKITNSL-----  | -LNRAVTKQEMWP----  |
| ----KPNTTRI-----  | -----GKITNAY-----  | ---LGKTKQE-----    |
| ----KPNTSKL-----  | -----GKITNAL-----  | KPADTYTKQQKF-----  |
| ----KPNTSAG-----  | -----GKITKAL-----  | ---KAMTKQE-----    |
| ----KPNTNRY-----  | -----GKITDSNTVMIT  | ----I-TKQELR-----  |
| ----KPNTNRV-----  | -----GKITDSM-----  | ----I-TKQELA-----  |
| ----KPNTNRL-----  | -----GKITDRH-----  | ----I-TKQEAN-----  |
| ----KPNTNRI-----  | -----GKITDIMTLKRD  | -----ITKQEALDTQIR  |
| ----KPNTNLS-----  | -----GKITAAY-----  | -ISIHATKQENFQ----  |
| ----KPNTNKT-----  | -----GKITAAM-----  | ---IKATKQEIALLE--  |
| ----KPNTNKI-----  | -----GKISYSM-----  | ---IGITKQE-----    |
| ----KPNTNAL-----  | -----GKISVYNQIVHQ  | HTYFAVTKQERL-----  |
| ----KPNSWASYPYLL  | -----GKISTFL-----  | ----H-TKTELLDALVS  |
| ----KPN SFGS----- | -----GKISTFK-----  | -----HTKQEMS-----  |
| ----KPNRV-PM----  | -----GKISTAY-----  | -----HTKQELR-----  |
| ----KPNRDAY-----  | -----GKISSVMAHGDW  | ----H-TKQELL-----  |
| ----KPNQY-PT----  | -----GKISSVF-----  | HSPSLGTKMERA-----  |
| ----KPNQY-PL----  | -----GKISSSLASTAN  | ----H-SKMELFESMSS  |
| ----KPNQY-PI----  | -----GKISSMLSDPQ   | -HSDMVTKQEKWD----  |
| ----KPNQTRQ-----  | -----GKISSIL-----  | ---HMETKQEKQIIW--  |
| ----KPNQTLS-----  | -----GKISSAL-----  | HLNLLSTKQEMH-----  |
| ----KPNQTLL-----  | -----GKISNVL-----  | ---GYFTKQE-----    |
| ----KPNQTLK-----  | -----GKISNVF-----  | ---GWLTKQEVLT SV-- |
| ----KPNQTKY-----  | -----GKISNTF-----  | GVSHSYTKQELV-----  |
| ----KPNQSNY-----  | -----GKISNSYTTHTM  | ---GVLTKQE-----    |
| ----KPNQ SNG----- | -----GKISNLL-----  | GTPDARTKQETW-----  |
| ----KPNQM-PS----  | -----GKISHKL-----  | ----G-TKQELV MLRTV |
| ----KPNQL-PW----  | -----GKISHFM-----  | ----G-TKQELLEHGGR  |
| ----KPNQGPT-----  | -----GKISHAY-----  | ---GSFTKQE-----    |

|                  |                   |                   |
|------------------|-------------------|-------------------|
| ----KPNQGP-----  | -----GKISEVL----- | ----GMSHQERYELQW- |
| ----KPNQF-PR---- | -----GKISEAS----- | ----GFTKQEKWSAIH- |
| ----KPNQEGT----- | -----GKISEAK----- | GDTGRFTKQQMT----- |
| ----KPNMY-PL---- | -----GKISDRIKFDDG | -----FTKQERF----- |
| ----KPNMW-PG---- | -----GKISASY----- | -----FTKMER-----  |
| ----KPNMR-PS---- | -----GKINQSL----- | -----ETKQERI----- |
| ----KPNMF-PR---- | -----GKINNXY----- | ---ESRTKQE-----   |
| ----KPNMF-PG---- | -----GKINNAL----- | ESQSHMTKQEVH----- |
| ----KPNLY-PY---- | -----GKINNAF----- | ---ERGTKQE-----   |
| ----KPNLY-PL---- | -----GKINDFM----- | ---EGLTKQE-----   |
| ----KPNLY-PI---- | -----GKILTHL----- | --EGFLTKQERSY---  |
| ----KPNLY-PA---- | -----GKILDAM----- | ----DWTQEMLMGHP-  |
| ----KPNLWPQ----- | -----GKIHNAM----- | --DRLSTKQEMWRP--- |
| ----KPNLL-PL---- | -----GKIHNAL----- | --DGKYTKQEHYTV--- |
| ----KPNLF-PR---- | -----GKIHDVFSHDTI | ----AWTKQEL-----  |
| ----KPNLF-PQ---- | -----GKIHDSL----- | -----ATKQEVY----- |
| ----KPNLF-PL---- | -----GKIGSFLGGHI  | -----ATKQEIL----- |
| ----KPNKWD-----  | -----GKIGQYFSEYAT | -ASESPTKQQFVD---- |
| ----KPNKF-PA---- | -----GKIFNTL----- | ---APLTKQE-----   |
| ----KPNFL-PK---- | -----GKIEWTM----- | ---ALDTKQQTRDLV-- |
| ----KPNCPSC----- | -----GKIESHF----- | ---AEMTKQESILQR-- |
| ----KPNAY-PA---- | -----GKIEAVYTNPYK |                   |
| ----KMNQWPP----- | -----GKIDYFI----- |                   |
| ---KKPNMY-Y----- | -----GKIDYAL----- |                   |
| ---KKPNMY-A----- | -----GKIDTFL----- |                   |
| ---KKPNYI-N----- | -----GKIDSYF----- |                   |
| ----KENRWPM----- | -----GKIDSFIRVEHG |                   |
| ----KENQWPS----- | -----GKIDNVLLKGLR |                   |
| ----KANVYPM----- | -----GKIDALL----- |                   |
| ----KANVYPG----- | -----GKIATSL----- |                   |
| ----KANVWPL----- | -----GKIATRL----- |                   |
| ----KANVFPT----- | -----GKIAQQL----- |                   |
| ----KANSYPQ----- | -----GKIAQEL----- |                   |
| ----KANSFGS----- | -----GKIAHYY----- |                   |
| ----KANRDPN----- | -----GKIAHAYRLGDA |                   |
| ----KANQSKI----- | -----GKIAEKM----- |                   |
| ----KANQGPL----- | -----GKIADLG----- |                   |
| ----KANQF-PW---- | -----GKIADKH----- |                   |
| ----KANQERT----- | -----GKIADAI----- |                   |
| ----KANMYPR----- | -----GKIAAQY----- |                   |
| ----KANMYPF----- | --GFAGKIASTFVD--- |                   |
| ----KANMWPS----- | ----DSKIADFYFTKM- |                   |
| ----KANMWPN----- | -----DKISHAMMTHTR |                   |
| ----KANMWPA----- | -AYPSSKIFSVLE---- |                   |
| ----KANMGPR----- | -----AKISNAL----- |                   |
| ----KANMGPF----- | -----AKISDVL----- |                   |
| ----KANKYPS----- | -----AKIANVL----- |                   |
| ---IKPNQF-R----- |                   |                   |
| -IAHKPNQGWWIH--- |                   |                   |
| --HTKSNQWYPFQM-- |                   |                   |
| --HSKSNQF-----   |                   |                   |

|                  |
|------------------|
| --HSKMNQY-----   |
| --HLKPNQV-----   |
| ---HKPNMR-H----- |
| ---HKPNMH-G----- |
| ---HKANQFL-----  |
| --HIKPNMWNPRPN-- |
| --HHKANLY-----   |
| --GSKANLF-----   |
| --GPKANQW-----   |
| ---GKPNTY-Y----- |
| --GKKPNTY-----   |
| --GFKPNMF-YPEL-  |
| --GAKPNQW-----   |
| --GAKANQFYLTYA-- |
| --GAKANLFWSSPT-- |
| ---FKPNVY-T----- |
| ---FKPNQY-L----- |
| ---FHPNTYN-----  |
| ---FHPNTWN-----  |
| --DSKPNRF-----   |
| --DPKPNSSDYWYF-- |
| -ASCKPNTSWCRN--- |
| ---AKPNVY-W----- |
| ---AKPNVY-DDVVIA |
| ---AKPNQWP-----  |
| ---AKPNMY-R----- |

### Binding of IgG antibodies to epitope-like peptides

**Suppl. Table 3:** Demographic and serologic features of individuals included in the study. Six individual sera were combined into one sample, resulting in the end in six pooled sera.

| Patient nr. | Sex | Age | slgE wasp | slgE Ves v 5 | Label |
|-------------|-----|-----|-----------|--------------|-------|
| 1           | F   | 32  | 1.06      | 3.6          | #1    |
| 2           | F   | 35  | 6.13      | 20.3         |       |
| 3           | M   | 52  | 9.82      | 56           |       |
| 4           | M   | 25  | 21.1      | 43.5         |       |
| 5           | M   | 39  | 4.53      | 12.5         |       |
| 6           | F   | 58  | 9.54      | 47.6         |       |
| 7           | F   | 30  | 27.2      | 67           | #2    |
| 8           | M   | 66  | 11        | 0.971        |       |
| 9           | M   | 45  | 8.21      | 36.3         |       |
| 10          | F   | 43  | 9.87      | 12.9         |       |
| 11          | M   | 36  | 7.63      | 33.2         |       |
| 12          | M   | 32  | 1.65      | 19.9         |       |
| 13          | F   | 23  | 18.7      | 65.7         |       |

|    |   |    |      |       |    |
|----|---|----|------|-------|----|
| 14 | M | 49 | 6.58 | 4.92  | #3 |
| 15 | F | 59 | 6.78 | 12.2  |    |
| 16 | F | 56 | 5    | 24.7  |    |
| 17 | M | 42 | 2.79 | 15    |    |
| 18 | F | 33 | 5.35 | 17.6  |    |
| 19 | M | 26 | 26.6 | 57.7  | #4 |
| 20 | M | 48 | 0.84 | 0.656 |    |
| 21 | F | 54 | 67.8 | 6.15  |    |
| 22 | F | 35 | 2.07 | 0.9   |    |
| 23 | M | 19 | 11.5 | 5.24  |    |
| 24 | M | 21 | 2.9  | 1.54  | #5 |
| 25 | M | 62 | 4.43 | 33.5  |    |
| 26 | F | 60 | 87.4 | 0.48  |    |
| 27 | F | 37 | 8    | 6.6   |    |
| 28 | F | 24 | 2.24 | 0.5   |    |
| 29 | F | 39 | 1.26 | 4.51  | #6 |
| 30 | M | 66 | 22.3 | 1.84  |    |
| 31 | F | 49 | 19.8 | 15.7  |    |
| 32 | F | 19 | 3.11 | 0.53  |    |
| 33 | F | 34 | 4.34 | 8.86  |    |
| 34 | F | 39 | 4.11 | 0.76  | #6 |
| 35 | M | 32 | 5.24 | 3.68  |    |
| 36 | F | 25 | 1.12 | 2.51  |    |



**Suppl. Table 4:** Sequences of linear peptides subjected to microarray analysis and the respective immunofluorescence intensities from six groups of individuals. Negative control peptides are designated in bold.

| <b>Sequence</b> | <b>#1</b> | <b>#2</b> | <b>#3</b> | <b>#4</b> | <b>#5</b> | <b>#6</b> | <b>MEDIAN</b> |
|-----------------|-----------|-----------|-----------|-----------|-----------|-----------|---------------|
| HTKQELL         | 50864.33  | 24233.33  | 41363.67  | 62352.67  | 44506.67  | 40949.33  | 42935.17      |
| YSSLKPNKYAVW    | 15893.33  | 33830.00  | 19442.00  | 36808.67  | 31678.33  | 41532.33  | 32754.17      |
| GFKPNMFYYPEL    | 19835.33  | 20461.00  | 21825.67  | 43457.67  | 31935.67  | 43782.67  | 26880.67      |
| KANQFPW         | 12957.67  | 29566.67  | 15048.00  | 27505.00  | 24024.33  | 28984.67  | 25764.67      |
| GKIGSFLGGGHI    | 14442.33  | 17750.33  | 20801.00  | 29874.00  | 27154.67  | 32336.33  | 23977.83      |
| DPKPNSSDYWYF    | 12557.00  | 14137.00  | 16060.33  | 32262.67  | 30039.00  | 36881.67  | 23049.67      |
| GKIDSYF         | 12697.67  | 14531.33  | 15807.33  | 32325.33  | 27926.33  | 32145.67  | 21866.83      |
| IAHKPNQGWWIH    | 11793.33  | 60922.33  | 14252.67  | 23686.33  | 19107.33  | 22857.33  | 20982.33      |
| GFAGKIASTFVD    | 9222.33   | 20327.33  | 12665.33  | 21946.33  | 19958.67  | 44890.67  | 20143.00      |
| GKIDYFI         | 11930.33  | 12806.00  | 14226.67  | 27226.33  | 25027.00  | 27157.00  | 19626.83      |
| QGKPNQWANYFL    | 11452.00  | 11568.33  | 15335.67  | 22906.33  | 20535.33  | 25952.33  | 17935.50      |
| HMETKQEKQIIW    | 9398.67   | 15792.00  | 11499.00  | 22332.33  | 18189.67  | 22506.33  | 16990.83      |
| GKIDSFIRVEHG    | 9480.67   | 10240.00  | 12590.33  | 30291.33  | 20583.67  | 26616.00  | 16587.00      |
| GKIGQYFSEYAT    | 7821.67   | 11660.33  | 9955.00   | 23605.33  | 21245.33  | 22521.67  | 16452.83      |
| GKISSVMAHGDW    | 9220.00   | 14373.33  | 15209.67  | 15568.33  | 15278.33  | 18010.33  | 15244.00      |
| STKQETYTDKHY    | 10782.67  | 9859.00   | 12438.67  | 18233.33  | 17596.00  | 18598.33  | 15017.33      |
| LLANTGKIQKYL    | 8964.33   | 10023.67  | 11715.33  | 21481.33  | 17429.67  | 23338.00  | 14572.50      |
| TKQELPY         | 8870.00   | 9407.00   | 10504.67  | 20470.33  | 16003.67  | 20255.67  | 13254.17      |
| GKITNAY         | 8690.33   | 8751.33   | 10240.33  | 34280.33  | 15723.33  | 19068.00  | 12981.83      |
| NKPNQYF         | 9383.00   | 8121.67   | 10404.33  | 16407.00  | 14739.00  | 22454.33  | 12571.67      |
| ATKQEVY         | 7378.00   | 7184.33   | 9099.33   | 16262.33  | 12392.67  | 16219.00  | 10746.00      |
| LDKPNRY         | 8207.33   | 6957.33   | 8587.67   | 14372.67  | 12801.33  | 17421.00  | 10694.50      |
| GKIFNTL         | 7059.00   | 7945.00   | 8433.67   | 13486.00  | 12239.67  | 14953.33  | 10336.67      |
| SHKPNVF         | 8310.67   | 6121.00   | 9111.00   | 12728.33  | 11525.33  | 12021.00  | 10318.17      |
| KPNVYPL         | 7797.00   | 7104.67   | 8929.67   | 15093.67  | 11119.00  | 11305.67  | 10024.33      |
| AKPNVYDDVVIA    | 6681.67   | 5528.67   | 7947.33   | 11029.67  | 11802.33  | 12952.00  | 9488.50       |

|                |                |                |                |                |                |                |                |
|----------------|----------------|----------------|----------------|----------------|----------------|----------------|----------------|
| TKQEANW        | 5694.33        | 8613.67        | 7399.67        | 14955.67       | 10178.67       | 12699.00       | 9396.17        |
| SGKPNVW        | 6769.33        | 13646.33       | 7107.00        | 9262.33        | 8757.33        | 8907.33        | 8832.33        |
| GKISDRIKFDDG   | 5969.67        | 6664.00        | 6777.00        | 37386.67       | 10554.33       | 13763.33       | 8665.67        |
| TNVYTKQESMIM   | 4017.00        | 6947.00        | 5394.67        | 11490.00       | 9124.00        | 11673.67       | 8035.50        |
| GKIVDSHVDMFR   | 6426.67        | 5372.67        | 6721.33        | 11688.67       | 9311.33        | 13218.33       | 8016.33        |
| GKITSMY        | 6966.33        | 5959.67        | 7051.33        | 8656.33        | 9590.67        | 8544.33        | 7797.83        |
| GKITDIMTLKRD   | 5075.67        | 16964.00       | 5727.33        | 8243.00        | 7099.33        | 9680.67        | 7671.17        |
| KPNQYPI        | 5665.00        | 5974.00        | 6570.33        | 9347.67        | 7780.33        | 9155.00        | 7175.33        |
| GKINDFM        | 6002.00        | 4528.33        | 6702.67        | 9183.00        | 7255.00        | 8149.00        | 6978.83        |
| ITKQELR        | 5578.33        | 5141.00        | 5440.33        | 11328.00       | 8181.00        | 12101.33       | 6879.67        |
| LNRAVTKQEMWP   | 4538.00        | 4550.67        | 5726.67        | 7672.00        | 10114.00       | 10221.67       | 6699.33        |
| <b>QQLNIPP</b> | <b>4708.67</b> | <b>4575.33</b> | <b>6046.67</b> | <b>9009.00</b> | <b>7150.33</b> | <b>8789.33</b> | <b>6598.50</b> |
| VKPNLYPSWNMS   | 4794.67        | 4511.33        | 7407.00        | 6536.67        | 5926.00        | 6510.67        | 6218.33        |
| VKPNLYPSNDPI   | 5416.67        | 3510.33        | 8521.67        | 6965.33        | 5449.67        | 7018.00        | 6207.50        |
| LPAHTKQEMRYL   | 6051.33        | 3306.00        | 4620.33        | 7957.33        | 6207.00        | 11504.67       | 6129.17        |
| NWTKQERWAVSA   | 4982.67        | 4206.67        | 4978.67        | 8548.33        | 7004.33        | 9068.67        | 5993.50        |
| ESQSHMTKQEVH   | 3930.67        | 13084.33       | 3943.33        | 6632.67        | 5040.33        | 6721.00        | 5836.50        |
| ITKQEALDTQIR   | 3671.67        | 4948.33        | 4335.67        | 8069.33        | 6537.33        | 8465.33        | 5742.83        |
| HIKPNMWNPRPN   | 4107.67        | 63709.67       | 3577.67        | 5861.00        | 6647.67        | 5515.00        | 5688.00        |
| VTKQEYM        | 4498.33        | 3714.00        | 4835.67        | 8054.67        | 6456.67        | 8527.00        | 5646.17        |
| GKISSAL        | 3788.67        | 3483.00        | 5181.67        | 8113.00        | 5228.33        | 7410.33        | 5205.00        |
| KPNQSNY        | 4196.67        | 4128.00        | 4363.00        | 7250.67        | 5838.67        | 7692.00        | 5100.83        |
| EGLTKQE        | 3950.00        | 3641.67        | 4675.67        | 6898.00        | 5434.67        | 6154.00        | 5055.17        |
| GKIADLG        | 4069.67        | 4407.67        | 4462.33        | 6599.67        | 5614.33        | 6894.33        | 5038.33        |
| GKIAQEL        | 4415.33        | 3899.33        | 4587.67        | 20145.67       | 5814.33        | 5445.00        | 5016.33        |
| TTKQERL        | 4366.67        | 4240.33        | 3943.00        | 50581.33       | 5665.33        | 5585.33        | 4976.00        |
| ITKQELA        | 3444.00        | 3606.00        | 4113.33        | 7407.00        | 5752.67        | 7991.00        | 4933.00        |
| KPNMYPL        | 4355.67        | 3428.67        | 4611.00        | 7649.33        | 4924.33        | 5879.33        | 4767.67        |
| WGMTKQE        | 3747.67        | 4230.33        | 4124.67        | 8746.00        | 5188.00        | 7559.33        | 4709.17        |
| MGTKQEHLGPIR   | 5220.33        | 3405.00        | 3274.00        | 5458.00        | 4196.33        | 6418.33        | 4708.33        |

|                |                |                |                |                |                |                |                |
|----------------|----------------|----------------|----------------|----------------|----------------|----------------|----------------|
| KANQERT        | 3844.67        | 3296.33        | 4141.00        | 6837.33        | 5256.67        | 6672.00        | 4698.83        |
| LTKQESR        | 3659.00        | 3045.00        | 3378.00        | 6155.00        | 4900.33        | 7515.33        | 4279.67        |
| TKQEMRL        | 4116.33        | 2401.00        | 4113.00        | 8252.00        | 4406.67        | 7836.00        | 4261.50        |
| ERGTKQE        | 2589.00        | 2614.33        | 4500.00        | 5111.00        | 3982.67        | 5783.67        | 4241.33        |
| GKITNAL        | 3274.67        | 2989.67        | 3805.67        | 6903.33        | 4576.67        | 6123.33        | 4191.17        |
| GKITQAMNVSQR   | 3494.33        | 2764.00        | 4344.00        | 8113.67        | 3961.67        | 5483.67        | 4152.83        |
| KANMWPS        | 4060.67        | 3403.00        | 3801.00        | 5167.00        | 4114.67        | 5392.33        | 4087.67        |
| KANKYPS        | 3822.33        | 3283.33        | 3318.00        | 4653.33        | 4196.00        | 4766.33        | 4009.17        |
| NMLTKQE        | 2148.33        | 2755.67        | 2379.67        | 6102.33        | 5017.67        | 5954.00        | 3886.67        |
| AEMTKQESILQR   | 3877.00        | 3443.00        | 3434.33        | 5500.00        | 3599.33        | 6981.33        | 3738.17        |
| TKQEGRT        | 3274.67        | 2513.00        | 3524.00        | 5568.67        | 3916.33        | 4318.67        | 3720.17        |
| <b>AHRVQTA</b> | <b>3337.33</b> | <b>2839.67</b> | <b>2986.33</b> | <b>5260.33</b> | <b>4102.67</b> | <b>5303.33</b> | <b>3720.00</b> |
| TKQEAPI        | 2621.00        | 2692.00        | 3365.67        | 5266.00        | 3544.33        | 5422.33        | 3455.00        |
| PNLTKQE        | 2389.17        | 2714.83        | 2590.50        | 5403.83        | 4120.17        | 5443.50        | 3417.50        |
| <b>NLLMSHA</b> | <b>3125.67</b> | <b>2462.67</b> | <b>3309.67</b> | <b>4847.33</b> | <b>3314.00</b> | <b>4793.67</b> | <b>3311.83</b> |
| GKIATSL        | 2911.00        | 2731.00        | 3102.33        | 5714.00        | 3428.67        | 3865.67        | 3265.50        |
| ITKQEAN        | 1907.67        | 17160.33       | 2014.33        | 3587.67        | 2858.67        | 4258.67        | 3223.17        |
| WKPNQAPFPAPM   | 2402.33        | 2434.00        | 2778.00        | 5224.67        | 3519.00        | 4762.67        | 3148.50        |
| LTKQETS        | 2896.67        | 2248.67        | 2509.67        | 4220.33        | 3280.33        | 5371.67        | 3088.50        |
| LTKQEGM        | 2325.67        | 2291.33        | 2389.67        | 4186.67        | 3498.00        | 5281.67        | 2943.83        |
| GKITNSL        | 2486.00        | 2135.33        | 2701.33        | 5482.00        | 2783.33        | 4399.33        | 2742.33        |
| SNGTKQE        | 2015.33        | 2232.00        | 2036.67        | 3944.67        | 3110.67        | 4073.67        | 2671.33        |
| VPKPNVGMWGPV   | 2742.00        | 2140.33        | 2466.33        | 4536.67        | 2349.33        | 3443.67        | 2604.17        |
| LTKQERM        | 2731.67        | 1961.33        | 1946.67        | 3235.67        | 2437.33        | 3840.33        | 2584.50        |
| GKISNSYTTHTM   | 2327.33        | 1741.33        | 2041.00        | 3984.33        | 2648.00        | 4211.33        | 2487.67        |
| GKIVDSLQSSP    | 1991.67        | 1727.33        | 1630.67        | 2828.00        | 2362.00        | 4758.33        | 2176.83        |
| VKAHVSPKQEM    | 1760.67        | 1562.67        | 1605.00        | 2052.00        | 1801.67        | 2523.00        | 1781.17        |

**Suppl. Table 5:** Sequences of cyclic peptides subjected to microarray analysis and the respective immunofluorescence intensities from six groups of individuals. Negative control peptides are designated in bold.

| Sequence       | #1       | #2       | #3       | #4       | #5       | #6       | MEDIAN   |
|----------------|----------|----------|----------|----------|----------|----------|----------|
| CGFKPNMFYYPELC | 23809.33 | 25518.00 | 31407.00 | 55694.00 | 48075.33 | 56814.00 | 39741.17 |
| CYSSLKPNKYAVWC | 19036.00 | 23484.67 | 23492.33 | 45662.00 | 42490.67 | 53047.67 | 32991.50 |
| CDPKPNSSDYWYFC | 15191.00 | 17652.33 | 19554.00 | 39612.33 | 44876.00 | 42230.00 | 29583.17 |
| CKANQFPWC      | 18027.50 | 20680.50 | 21665.83 | 42247.17 | 33746.50 | 45315.83 | 27706.17 |
| CGKIDSYFC      | 12864.00 | 17037.33 | 17787.33 | 40936.67 | 34880.33 | 38725.33 | 26333.83 |
| CVKPNLYPSNDPIC | 24709.00 | 12940.67 | 24388.00 | 25614.00 | 21818.00 | 24639.33 | 24513.67 |
| CGKIDSFIRVEHGC | 13109.67 | 14898.67 | 16240.33 | 41205.67 | 30876.00 | 37868.00 | 23558.17 |
| CNKPNQYFC      | 13308.83 | 15986.83 | 16892.17 | 37767.83 | 28445.17 | 39057.50 | 22668.67 |
| CITKQELRC      | 12912.00 | 16251.00 | 15836.67 | 29175.33 | 28793.33 | 31192.67 | 22522.17 |
| CGKIDYFIC      | 11840.67 | 16604.33 | 15350.33 | 34107.00 | 27763.00 | 31194.33 | 22183.67 |
| CQGKPNQWANYFLC | 13234.33 | 16274.33 | 16147.00 | 32148.33 | 27909.67 | 33087.00 | 22092.00 |
| CGKIFNTLC      | 14278.67 | 14749.67 | 15036.00 | 28523.33 | 26337.67 | 31639.67 | 20686.83 |
| CGKITNAYC      | 12795.33 | 14760.33 | 16577.67 | 42467.00 | 24613.33 | 33368.33 | 20595.50 |
| CKPNVYPLC      | 15012.00 | 17073.67 | 16029.00 | 34217.00 | 23719.33 | 32478.00 | 20396.50 |
| CSTKQETYTDKHYC | 13593.67 | 13867.67 | 15466.33 | 25523.67 | 23338.33 | 27379.33 | 19402.33 |
| CTKQELPYC      | 11666.67 | 13388.00 | 14509.00 | 32360.33 | 22800.67 | 29631.00 | 18654.83 |
| CAKPNVYDDVVIAC | 10651.00 | 11312.33 | 13409.00 | 23291.33 | 22877.33 | 25964.33 | 18143.17 |
| CHMETKQEKQIWC  | 11429.00 | 12541.67 | 14500.33 | 31837.33 | 21016.33 | 31333.67 | 17758.33 |
| CGKIGSFLGGGHIC | 12813.00 | 14147.00 | 16898.67 | 20978.00 | 17407.67 | 21757.00 | 17153.17 |
| CKPNQYPIC      | 13001.00 | 12660.00 | 13367.67 | 22773.00 | 19474.00 | 29588.00 | 16420.83 |
| CGKIGQYFSEYATC | 8311.00  | 11827.33 | 11641.00 | 24939.33 | 20885.67 | 24301.33 | 16356.50 |
| CSGKPNVWC      | 13084.67 | 12191.33 | 13221.33 | 21903.67 | 19287.33 | 29545.67 | 16254.33 |
| CIAHKPNQGWWIHC | 12765.67 | 15068.67 | 12969.33 | 20904.33 | 17176.00 | 30667.33 | 16122.33 |
| CITKQELAC      | 9057.00  | 11169.33 | 11482.67 | 23597.00 | 20357.33 | 22214.33 | 15920.00 |
| CGKISSVMAHGDWC | 9801.00  | 12618.33 | 15523.00 | 16136.00 | 16715.67 | 18131.00 | 15829.50 |

|                  |                |                |                |                 |                 |                 |                 |
|------------------|----------------|----------------|----------------|-----------------|-----------------|-----------------|-----------------|
| CHTKQELLC        | 10408.67       | 11443.67       | 12196.33       | 22735.67        | 19211.67        | 22129.00        | 15704.00        |
| CTKQEANWC        | 10809.00       | 12504.33       | 12399.00       | 26462.33        | 18486.33        | 23898.33        | 15495.33        |
| CGKIAQELC        | 10818.00       | 9768.67        | 12320.00       | 18450.33        | 20428.33        | 20625.33        | 15385.17        |
| CGKINDFMC        | 10212.00       | 15381.33       | 10756.67       | 16221.00        | 15271.67        | 24701.33        | 15326.50        |
| CLDKPNRYC        | 11708.67       | 10910.33       | 11943.67       | 18332.33        | 18175.67        | 31521.00        | 15059.67        |
| CGFAGKIASTFVDC   | 8724.33        | 11170.67       | 10855.67       | 21678.33        | 17986.67        | 22607.67        | 14578.67        |
| CATKQEVYC        | 7524.67        | 10133.33       | 9639.33        | 23730.33        | 18896.00        | 19409.67        | 14514.67        |
| CKPNQSNYC        | 8603.33        | 8981.33        | 11262.67       | 14877.00        | 15579.33        | 22123.00        | 13069.83        |
| CLLANTGKIQKYL    | 9188.00        | 11335.67       | 9160.67        | 16737.67        | 13711.33        | 19309.67        | 12523.50        |
| CVKPNLYPSWNMSC   | 12755.67       | 6277.33        | 14113.67       | 12218.33        | 10107.33        | 17261.00        | 12487.00        |
| CGKIADLGC        | 8668.67        | 11256.33       | 9638.33        | 14269.67        | 13185.67        | 16966.00        | 12221.00        |
| CSHKPNVFC        | 11004.33       | 9739.00        | 9599.33        | 17200.00        | 13385.33        | 18392.33        | 12194.83        |
| CVTKQEYMC        | 7473.67        | 9775.00        | 8949.00        | 20472.33        | 14047.00        | 16258.33        | 11911.00        |
| CGKISDRIKFDDGC   | 8343.67        | 8428.67        | 10073.00       | 24346.67        | 13442.00        | 18172.67        | 11757.50        |
| <b>CQQLNIPPC</b> | <b>8041.33</b> | <b>8028.67</b> | <b>9297.33</b> | <b>18847.00</b> | <b>13467.00</b> | <b>15584.67</b> | <b>11382.17</b> |
| CTKQEAPIC        | 10552.17       | 7393.83        | 20247.83       | 13522.50        | 9185.83         | 12014.83        | 11283.50        |
| CKPNMYPLC        | 9389.33        | 8886.00        | 8440.67        | 12129.67        | 10559.00        | 17505.00        | 9974.17         |
| CWGMTKQEC        | 5525.67        | 6472.00        | 6486.67        | 13734.00        | 24735.33        | 12260.67        | 9373.67         |
| CEGLTKQEC        | 6829.00        | 6207.00        | 7580.67        | 10677.00        | 15031.67        | 17224.33        | 9128.83         |
| CNWTQERWAVSAC    | 4945.00        | 6033.33        | 6749.00        | 12674.67        | 10281.33        | 14214.00        | 8515.17         |
| CLTKQETSC        | 5967.67        | 6571.00        | 6481.33        | 12539.33        | 9755.00         | 11363.33        | 8163.00         |
| CGKITSMYC        | 6377.00        | 7520.67        | 6942.67        | 8105.00         | 7955.67         | 10487.33        | 7738.17         |
| CLTKQESRC        | 6886.33        | 5901.67        | 6170.00        | 9863.33         | 8331.67         | 9593.00         | 7609.00         |
| CPNLTKQEC        | 5042.33        | 4864.00        | 5296.00        | 8952.00         | 13939.00        | 10858.33        | 7124.00         |
| CTNVYTKQESMIMC   | 4387.33        | 5439.00        | 5896.00        | 11507.33        | 8230.67         | 14572.33        | 7063.33         |
| CGKITDIMTLKRDC   | 6487.33        | 5727.00        | 6932.67        | 8122.00         | 7049.00         | 9983.33         | 6990.83         |
| CGKIVDSHVDMFRC   | 4040.00        | 5361.00        | 5315.33        | 10774.00        | 8535.00         | 14103.00        | 6948.00         |
| CERGTKQEC        | 4592.00        | 3396.00        | 3435.50        | 27715.00        | 9588.33         | 9123.33         | 6857.67         |
| CTTKQERLC        | 6091.00        | 4635.00        | 4935.00        | 6593.00         | 6523.67         | 7091.67         | 6307.33         |
| CNMLTKQEC        | 4539.00        | 4294.67        | 4639.67        | 7881.00         | 18377.67        | 8943.33         | 6260.33         |

|                  |                |                |                |                |                |                |                |
|------------------|----------------|----------------|----------------|----------------|----------------|----------------|----------------|
| CITKQEALDTQIRC   | 6026.00        | 5536.33        | 4856.00        | 6649.67        | 6437.00        | 7435.67        | 6231.50        |
| CLNRAVTKQEMWPC   | 6199.00        | 5241.67        | 5292.00        | 6185.33        | 6303.33        | 10325.00       | 6192.17        |
| CGKITQAMNVSQRC   | 5259.00        | 4592.67        | 5723.67        | 8868.33        | 6496.00        | 8965.67        | 6109.83        |
| CVPKPNVGMWGPVC   | 6965.00        | 3909.00        | 5228.00        | 7799.33        | 4435.00        | 6925.00        | 6076.50        |
| CKANMWPC         | 6492.83        | 4725.50        | 4659.83        | 6067.50        | 5899.17        | 16057.50       | 5983.33        |
| CGKISSALC        | 4951.00        | 4654.00        | 5856.33        | 6560.67        | 5964.67        | 6971.67        | 5910.50        |
| CGKITNALC        | 5091.00        | 3812.00        | 6292.00        | 5494.33        | 5991.67        | 9193.67        | 5743.00        |
| CITKQEANC        | 4547.00        | 5001.67        | 4193.00        | 7481.00        | 6390.00        | 10100.33       | 5695.83        |
| CKANKYPSC        | 4872.00        | 5988.33        | 4353.33        | 5824.00        | 5236.67        | 14626.00       | 5530.33        |
| CESQSHMTKQEVHC   | 5603.67        | 3639.00        | 3791.33        | 6346.67        | 5052.33        | 7702.00        | 5328.00        |
| CGKITNSLC        | 4945.67        | 3645.67        | 5514.33        | 5011.67        | 6624.33        | 10958.67       | 5263.00        |
| CLPAHTKQEMRYLC   | 4987.33        | 4667.67        | 4128.00        | 5804.00        | 5371.33        | 5527.00        | 5179.33        |
| CSNGTKQEC        | 2783.33        | 2728.33        | 2152.00        | 6101.67        | 8836.00        | 5959.00        | 4371.17        |
| CAEMTKQESILQRC   | 5236.67        | 2303.67        | 3450.67        | 5826.67        | 2999.67        | 5528.67        | 4343.67        |
| CKANQERTC        | 4009.67        | 3579.33        | 4087.33        | 6452.00        | 4470.00        | 6838.67        | 4278.67        |
| <b>CAHRVQTAC</b> | <b>4421.00</b> | <b>2351.00</b> | <b>2831.67</b> | <b>5411.67</b> | <b>3631.33</b> | <b>4647.00</b> | <b>4026.17</b> |
| CGKIVDSLQSSPC    | 5009.00        | 3596.67        | 4056.00        | 3959.67        | 3706.33        | 11784.00       | 4007.83        |
| CTKQEGRTC        | 3545.67        | 2842.67        | 3234.67        | 5282.67        | 2991.33        | 5447.00        | 3390.17        |
| <b>CNLLMSHAC</b> | <b>3973.33</b> | <b>2137.33</b> | <b>3121.33</b> | <b>3607.67</b> | <b>2239.67</b> | <b>5498.33</b> | <b>3364.50</b> |
| CHIKPNMWNPRPNC   | 5293.33        | 2280.00        | 1956.00        | 4493.67        | 2791.00        | 3888.67        | 3339.83        |
| CLTKQEGMC        | 3494.00        | 2838.00        | 2765.00        | 4226.33        | 3140.67        | 5473.00        | 3317.33        |
| CWKPNQAPFPAPMC   | 2638.67        | 5270.00        | 2252.67        | 3905.33        | 2396.67        | 4794.33        | 3272.00        |
| CTKQEMRLC        | 4715.83        | 1927.50        | 2134.17        | 3258.83        | 2622.17        | 4056.17        | 2940.50        |
| CMGTKQEHLGPIRC   | 5767.33        | 1772.67        | 1799.00        | 3661.67        | 2371.00        | 3401.00        | 2886.00        |
| CLTKQERMC        | 4505.50        | 1887.83        | 1628.17        | 3404.17        | 2034.83        | 3867.50        | 2719.50        |
| CGKIATSLC        | 1890.33        | 2422.00        | 2620.33        | 2463.00        | 2350.33        | 3542.33        | 2442.50        |
| CGKISNSYTTHTMC   | 2581.67        | 1960.67        | 1478.67        | 16783.00       | 2404.67        | 2452.67        | 2428.67        |
| CVKAHVSPKQEMC    | 2677.33        | 1705.67        | 1379.67        | 2248.67        | 1874.00        | 1939.00        | 1906.50        |
